1 **Geometric and Topological Approaches to Shape Variation in *Ginkgo* Leaves**

2

3 Luke Mander<sup>1</sup>, Martin Bauer<sup>2</sup>, Haibin Hang<sup>3</sup>, Washington Mio<sup>2</sup>

4

5 <sup>1</sup>School of Environment, Earth and Ecosystem Sciences, The Open University,

6 Milton Keynes, MK7 6AA, UK; <sup>2</sup>Department of Mathematics, Florida State

7 University, Tallahassee, FL 32306, USA; <sup>3</sup>Department of Mathematical Sciences,

8 University of Delaware, Newark, DE 19716, USA

9

10 Author for correspondence:

11 *Luke Mander*

12 *Email: luke.mander@gmail.com*

13

14

15

16

17

18

19

20

21

22

23

24

25

26

27

28

29

30

31

32

33

34 **Abstract**

35 Leaf shape is a key plant trait that varies enormously. The diversity of leaf shape,  
36 and the range of applications for data on this trait, requires frequent  
37 methodological developments so that researchers have an up-to-date toolkit  
38 with which to quantify leaf shape. We generated a dataset of 468 leaves  
39 produced by *Ginkgo biloba*, and 24 fossil leaves produced by evolutionary  
40 relatives of extant *Ginkgo*. We quantified the shape of each leaf by developing a  
41 geometric method based on elastic curves and a topological method based on  
42 persistent homology. Our geometric method indicates that shape variation in  
43 modern leaves is dominated by leaf size, furrow depth, and the angle of the two  
44 lobes at the base of the leaf that is also related to leaf width. Our topological  
45 method indicates that shape variation in modern leaves is dominated by leaf size  
46 and furrow depth. Both methods indicate that there is greater diversity in the  
47 shape of fossil leaves compared to modern leaves. The two approaches we have  
48 described can be applied to modern and fossil material, and are complementary:  
49 identifying similar primary patterns of variation, but revealing some different  
50 aspects of morphological variation.

51

52 **Key words:** Morphometric methods, elastic curves, persistent homology,  
53 biological shape, plant traits.

54

55

56

57

58

59

60

61

62

63

64

65

66

## 67 **Introduction**

68 Leaf shape is a fascinatingly diverse plant trait. It can vary between taxa,  
69 between individuals in different populations of the same species, and for some  
70 species there are striking variations in leaf shape within a single plant, a  
71 phenomenon known as heterophylly. Additionally, different regions of a leaf  
72 expand at different rates during development, and this leads to allometric  
73 changes in shape as a leaf grows. Leaves are primary sites of photosynthesis and  
74 play a central role in the growth and survival of a plant, and work has shown that  
75 variation in leaf shape may be related to thermoregulation, the constraints of  
76 hydraulics and mechanics, patterns of leaf expansion, as well as the avoidance of  
77 herbivory and the optimal interception of light (Nicotra *et al.*, 2011). Leaf shape  
78 is therefore a trait for which there are many functional trade-offs, and from an  
79 ecological perspective may be viewed “not as a single major axis, but rather as an  
80 option that fine tunes the leaf to its conditions over both short and evolutionary  
81 time spans” (Nicotra *et al.*, 2011, p. 547).

82 The taxonomic and ecological significance of leaf shape has led to the  
83 development of numerous methods to characterize this trait. Certain methods  
84 rely on largely qualitative observation. For example, aspects of leaf shape can be  
85 described using specialist terminology (Leaf Architecture Working Group 1999),  
86 which allows leaves to be placed into categories based on their gross  
87 morphology, and this approach has proved useful in studies of plant architecture  
88 (e.g. Leigh, 1999; Barthelemy & Caraglio, 2007) and studies of fossil leaves that  
89 may not be preserved in their entirety (e.g. Johnson, 1992). Other methods for  
90 characterising leaf shape are based on morphometric measurements of certain  
91 features on a leaf, which can either be made manually by human researchers or  
92 computationally using image analysis software. For example, Leigh *et al.* (2011)  
93 described leaf shape using measurements of leaf area and leaf dissection (leaf  
94 perimeter/area) in the context of plant hydraulics, and Royer *et al.* (2005) used  
95 the same measure of leaf dissection to investigate the relationship between mean  
96 annual temperature and leaf shape. Measurements of such morphological  
97 features are often used to generate indices of leaf shape, such as compactness  
98 (perimeter<sup>2</sup>/area) and shape factor ( $4\pi \times \text{leaf area}/\text{perimeter}^2$ ), which are used  
99 to summarize aspects of leaf shape and show how it relates to the environment

100 or has changed through time (Royer *et al.*, 2008, 2009; Bacon *et al.*, 2013).  
101 Morphometric techniques that use landmarks (a constellation of discrete  
102 anatomical loci, each described by 2- or 3-dimensional Cartesian coordinates  
103 (Webster & Sheets, 2010)) to quantify morphology have also been employed to  
104 capture variation in leaf shape (Weight *et al.*, 2008), and have highlighted  
105 differing developmental and evolutionary contributions to leaf shape (Chitwood  
106 *et al.*, 2016). Persistent homology—a topological data analysis method—has also  
107 been applied to the problem of quantifying leaf shape (Li *et al.*, 2018a,b), and  
108 represents a morphometric framework to measure plant form that allows  
109 comparison of the morphology of different plant organs such as leaves, roots and  
110 stems (Bucksch *et al.*, 2017; Li *et al.*, 2017).

111 Owing to the diversity of leaf form—and the range of applications for data  
112 on leaf morphology—regular methodological experimentation is required so that  
113 researchers have an up-to-date toolkit with which to quantify this key plant trait.  
114 In this paper, we provide such experimentation through a quantitative  
115 morphological study of the leaves of *Ginkgo biloba* L., an extant gymnosperm that  
116 is noted for the diversity of leaf shapes that are produced by individual  
117 specimens (e.g. Leigh *et al.*, 2011). *Ginkgo* has a long evolutionary history and  
118 extinct relatives of this plant were important elements of Earth’s vegetation  
119 during the Mesozoic Era (~250–65 million years ago). Fossil leaves of plants that  
120 are evolutionary ancestors of living *Ginkgo* are commonly found in sedimentary  
121 rocks, and our study includes a small number (24) of such fossil leaves.

122 We do not initially focus on any specific morphological features such as  
123 leaf length or the nature of the leaf margin. Instead, we take an exploratory  
124 approach to the morphology of *Ginkgo* leaves, using geometric and topological  
125 methods to reveal the features that explain the observed variation in leaf shape.  
126 Our specific aims are as follows: (1) to develop a geometric method and a  
127 topological method for quantifying leaf shape; (2) to apply these methods to the  
128 leaves of living *Ginkgo* in order to reveal which features explain the observed  
129 variation in the shape of sampled leaves; (3) to compare the results produced by  
130 the two methods in order to explore the degree to which they reveal different  
131 aspects of morphological variation; and (4) to apply our methods to fossil leaves

132 of ancient evolutionary relatives of living *Ginkgo* in order to demonstrate how  
133 they could be used to study the evolution of leaf shape through geological time.

134

### 135 **A Dataset of Modern and Fossil Leaves**

136 Mature and fully expanded leaves were harvested from a *Ginkgo biloba* tree  
137 growing as a specimen on the campus of The Open University, UK. The specimen  
138 is reproductively immature and was ascended using a ladder. Seven branches  
139 from approximately halfway up the specimen were removed from the trunk  
140 using a saw. Every leaf growing on each branch was plucked from the base of the  
141 petiole and dried in a plant press. A total of 468 leaves from a mixture of short-  
142 shoots and long-shoots were collected from the specimen. Each of these leaves  
143 was photographed next to a scale bar using a digital camera positioned 20cm  
144 above a light box. Twenty-two fossil leaves produced by evolutionary relatives of  
145 living *Ginkgo biloba* were extracted from the collections of the Natural History  
146 Museum in London, and two fossil leaves were extracted from the geology  
147 collections of the School of Environment, Earth and Ecosystem Sciences, The  
148 Open University (Table 1). Each fossil leaf was photographed next to a scale bar  
149 using a digital camera and the outline of each fossil was traced using Adobe  
150 Illustrator to create a digital outline of each leaf. The petioles of fossil leaves are  
151 frequently broken, distorted or completely absent as a result of the fossilization  
152 process. A central goal of our manuscript is to compare living and fossil *Ginkgo*  
153 leaves and in order to facilitate this, we have excluded the petiole from our  
154 analyses. Our analyses are therefore focussed on the shape of *Ginkgo* leaf blades.  
155 Our dataset of modern and fossil *Ginkgo* leaf images is available in the  
156 Supplementary Information.

157

### 158 **A Geometric Approach to Quantifying the Shape of Leaves**

#### 159 ***Methods***

160 We represented each *Ginkgo* leaf blade by its boundary curve, with values  
161 mapped in the plane (two dimensional Euclidean space) (Fig. 1). When  
162 considering these representations of *Ginkgo* leaves we factored out the actions of  
163 rotation and translation and reparameterization. For example, two identical  
164 leaves could each be represented by their boundary curves, but each curve could

165 be considered distinct from one another if they differed only by rotation (a curve  
166 could be presented at 90 degrees on top of the other for instance), but our  
167 analysis factors out such actions. It is possible to also factor out the action of  
168 scaling in analyses of this nature, however, since leaf size is relevant to our study  
169 we do not factor out scaling.

170 To quantitatively model morphological variation in our sample of *Ginkgo*  
171 leaves, we introduce a similarity measure for shapes that serves as the basis of  
172 statistical analysis. This is an intricate process for two main reasons: (1) the  
173 infinite dimensionality of the ensemble of all shapes; and (2) the non-linearity of  
174 shape space. To overcome this difficulty, we appeal to the concepts of  
175 Riemannian geometry, and use a Riemannian metric that quantifies the difficulty  
176 of morphing one boundary curve onto another by measuring the geodesic  
177 distance between the curves, accounting for rotations, translations and  
178 reparameterizations. This enables us to quantify shape similarity as the minimal  
179 deformation cost to reshape a curve, in this case a *Ginkgo* leaf contour. Despite  
180 the nonlinear nature of shape space, this framework allows us to calculate mean  
181 shapes and locally linearize shape data about the mean, which, in turn, lets us  
182 employ standard statistical methods on linearized data to analyse the shape  
183 variation present in our sample of *Ginkgo* leaves.

184 The Riemannian metric we employ is grounded on principles of linear  
185 elasticity and is formally defined on the ensemble of parametric curves, but its  
186 invariance properties ensure that it descends to a shape metric. A precise  
187 definition of the metric and a discussion of its main properties may be found in  
188 Bauer *et al.* (2017, 2019) (see also Klassen *et al.* (2004) for related shape  
189 metrics). In practice, the comparison of *Ginkgo* leaf boundary curves is a shape-  
190 matching problem, and to solve it we discretized the boundary curve of each leaf  
191 using a B-spline representation with 100 control points. This reduces the  
192 problem of comparing leaf boundary curves to a finite-dimensional optimization  
193 problem that can be solved with standard methods of numerical optimization.  
194 We use principal component analysis (PCA) to uncover the principal modes of  
195 shape variation in *Ginkgo* leaves.

196

197 **Results**

198 We calculated the Karcher mean of our sample of modern *Ginkgo* leaves (Fig. 1)  
199 and then locally linearized the data about the mean in order to uncover the  
200 principal modes of leaf shape variation. This was accomplished by solving a  
201 shape-matching problem between the mean and each leaf in the dataset.  
202 Principal component analysis on the linearized data indicated that  
203 approximately 30 components are needed to explain 80% of the shape variation  
204 in our sample of *Ginkgo* leaves (Fig. 2a), and we graphically display the first five  
205 modes of leaf shape variation using geodesic PCA plots (Fig. 2b–f). The first mode  
206 is leaf size (first principal component, Fig. 2b), the second and third modes are  
207 the depth of the furrow that separates the two lobes of the typical *Ginkgo* leaf,  
208 together with the angle of the two lobes at the base of the leaf that is also related  
209 to leaf width (second principal component, Fig. 2c). Some leaves, for example,  
210 have a very deep furrow whereas others have no furrow at all. Similarly, some  
211 leaves have lobes that are quite pointed and curve backwards towards the leaf  
212 base, whereas others have lobes that do not curve backwards. The interpretation  
213 of higher principal components is less clear. The third principal component  
214 might be connected to a shift in the lateral position of the furrow (Fig. 3d), and  
215 the fourth and fifth principal components may relate to the small indentations  
216 and crenulations on leaf margins (Fig. 2e,f).

217       Examples of variability in terms of the three primary morphological  
218 features identified by our geodesic plots (Fig. 2b,c) can be seen in a PCA  
219 ordination of our dataset of *Ginkgo* leaves (Fig. 3). Leaves towards the top are  
220 relatively small and leaves towards the base are relatively large (Fig. 3). Leaves  
221 to the left are typically characterized by a small or absent furrow, and/or lobes  
222 that do not curve backwards, leaves to the right are typically characterized by a  
223 furrow and/or pointed lobes that slightly curve backwards towards the leaf base  
224 (Fig. 3). This plot also highlights that the morphological space occupied by our  
225 sample of *Ginkgo* leaves, as delineated by our geometric approach, is organized  
226 as a single cloud. Most data points are concentrated towards the center of the  
227 ordination, and the distribution of data points becomes sparser with increasing  
228 distance from the center (Fig. 3).

229

230 **A Topological Approach to Quantifying the Shape of Leaves**

## 231 **Methods**

232 We employed the topological data analysis technique persistent homology (PH)  
233 (Edelsbrunner & Harer 2010; Otter *et al.* 2017; Li *et al.* 2018a,b) and represented  
234 each *Ginkgo* leaf in our dataset with a persistence barcode. To construct this  
235 barcode, for each point on the contour of a leaf, we calculated the distance to the  
236 point  $P$  where the leaf blade meets the petiole (Fig. 4a). Distance was measured  
237 in pixels and in our source images 152 pixels = 1 cm. All images were  
238 downsampled by 1/8 and so 19 pixels = 1 cm in our analyses. For each  $r > 0$ , we  
239 counted the number of connected components formed by the points on the  
240 contour whose distance to  $P$  is greater or equal to  $r$  and recorded this count as a  
241 barcode. For example, for  $r = 8.6$ , there are 4 connected components (these are  
242 the uninterrupted segments of the leaf blade contour, Fig. 4a), so there are  $b = 4$   
243 bars over that value of  $r$  (Fig. 4b). Similarly, for  $r = 7.0, 5.4, 3.8$ , (Fig. 4a) the  
244 corresponding number of bars is  $b = 3, 2, 1$  (Fig. 4b). The barcode summarizes  
245 the count as we gradually lower the threshold  $r$ , with bars disappearing as  
246 connected components coalesce and bars appearing as new components emerge.  
247 The coalescence of two connected components follows the elder rule: the first-  
248 born bar survives while the younger bar dies. Through this construct, we  
249 mapped the dataset of leaves to a dataset of barcodes, with each leaf described  
250 by a barcode. In order to facilitate statistical analysis, we vectorized each  
251 barcode by listing the length of the bars in decreasing order. Since different  
252 leaves may produce barcodes with different number of bars, we padded the tails  
253 of the vectors with zeros to make all vectors the same length. In our analysis of  
254 modern leaves, statistical analyses were performed on these padded vectors. In  
255 our analysis of modern and fossil *Ginkgo* leaves combined, statistical analyses  
256 were performed on vectors that were normalized by the length of the first bar  
257 (the first component of each normalized vector was therefore 1 and discarded).

258

## 259 **Results**

260 Figure 5 shows the results of PCA applied to the vectorized barcode data. The  
261 first PC explains approximately 75% of the total variance and inspection of the  
262 PC loadings indicates that it is dominated by leaf length, followed by furrow  
263 depth. The second PC explains about 22% of the total variance mainly as



264 variation in the depth of the furrow, followed by (negative) variation in leaf  
265 length. This ordination indicates that the morphological space occupied by our  
266 sample of *Ginkgo* leaves, as delineated by our topological approach, is organized  
267 as a single cloud, although the leaves with PC1 scores  $< 0$  and PC2 scores  $> 15$  are  
268 somewhat separated from the other leaves in our sample (Fig. 5). To facilitate  
269 visualization of shape variation among our sample of *Ginkgo* leaves, the original  
270 leaf images corresponding to two discrete paths, nearly parallel to the first two  
271 principal PC axes, are highlighted in Fig. 5. These two paths show contrasting  
272 behaviour: PC1 captures a pattern in which larger leaves have a deeper furrow,  
273 whereas PC2 captures a pattern in which smaller leaves have a deeper furrow.

274

### 275 **Application to Fossil *Ginkgo* Leaves**

276 Visual inspection of fossil leaf boundary curves highlights that the diversity of  
277 leaf shapes in our collection of *Ginkgo* fossils is greater than that found in our  
278 sample of modern *Ginkgo* leaves (compare Fig. 1 and Fig. 6a, see also the  
279 Supplementary Information). In particular, several fossil leaves are characterised  
280 by multiple deep furrows so that leaf blades consist of multiple lobes rather than  
281 just two as in the typical *Ginkgo biloba* leaf, while other fossils have highly  
282 dissected leaf margins. This greater diversity in fossil leaf shapes is picked up by  
283 both the geometric and the topological approaches we have described, and both  
284 indicate that there are fossil leaves situated outside the total range of  
285 morphological space occupied by modern *Ginkgo* leaves (Fig. 6b,c). Both  
286 approaches also highlight that there are some fossils leaves that are very similar  
287 to modern *Ginkgo* leaves, and there are some fossil and modern leaves that  
288 overlap in morphological space (Fig. 6b,c).

289         However, there are differences in the degree to which modern and fossil  
290 leaves are separated in morphological space using our two approaches. Using  
291 our geometric approach, relatively small leaves with shapes characterised by  
292 multiple lobes lie outside the morphological space occupied by modern *Ginkgo*  
293 leaves, while relatively large leaves with highly dissected margins plot within the  
294 space occupied by modern leaves (Fig. 6b). In contrast, using our topological  
295 approach, both of these types of fossil leaves plot outside the morphological  
296 space occupied by modern *Ginkgo* leaves (Fig. 6c). Our topological approach very

297 clearly captures similarities and differences between modern and fossil leaves  
298 that are expected on the basis of their visual appearance alone (Fig. 6c), whereas  
299 using our geometric approach the distinction between modern and fossil leaves  
300 is not as clear (Fig. 6b).

301

## 302 **Discussion**

### 303 ***Comparison of Approaches***

304 The two approaches we have described in this paper measure leaf shape in  
305 different ways: our geometric approach is based on analysing boundary curves  
306 with an elastic metric (Fig. 2), whereas our topological approach is based on  
307 measuring the number of connected components as a leaf is partitioned into  
308 different segments (Fig. 4). Despite these differences, the two approaches both  
309 indicate that leaf size and the nature of the furrow separating the two lobes of a  
310 typical *Ginkgo* leaf are primary features that explain the observed variation in  
311 leaf shape. Both approaches also distinguish the leaves of *Ginkgo* long shoots  
312 from those of short shoots. The leaves of long shoots are typically smaller and  
313 can have a deep wide furrow and a dissected margin, while the leaves of short  
314 shoots are typically larger and can have a less pronounced furrow (Leigh *et al.*,  
315 2011). These two leaf types also have different structural and hydraulic  
316 properties, probably related to greater hydraulic limitation of long-shoot leaves  
317 during leaf expansion (Leigh *et al.*, 2011). In the PCA summary of our geometric  
318 approach, the long shoot leaves are situated to the top left of the plot with low  
319 PC1 scores and high PC2 scores, and form a sparsely occupied region of  
320 morphological space (Fig. 3). In the PCA summary of our topological approach,  
321 the long shoot leaves are situated in the top left of the plot with low PC1 scores  
322 and high PC2 scores, and form a sparsely occupied region of *Ginkgo* leaf  
323 morphospace (Fig. 5).

324 There are also certain differences in the morphological features  
325 pinpointed by each approach. For example, our geometric approach suggests  
326 that the angle of the two lobes at the base of the leaf (also related to leaf width) is  
327 an important mode of morphological variation in the population of leaves we  
328 have studied (Fig. 2c), but this aspect of leaf morphology is not clearly picked up  
329 by our topological approach (Fig. 5). Additionally, our topological approach is

330 able to quantify the nature of the indentations in the leaf margin more clearly  
331 than our geometric approach. This is because our topological features, by design,  
332 precisely measure the depth of indentations—from large furrows to minor  
333 crenulations—in the leaf margin. The vectors we used in our topological analysis  
334 of modern and fossil *Ginkgo* leaves were normalized by the length of the first bar,  
335 and each vector therefore encodes the depths of the various indentations in the  
336 leaf margin relative to absolute leaf size ordered from deep to shallow. This is  
337 highlighted in the horizontal transect in Figure 6d: to the left are modern and  
338 fossil *Ginkgo* leaves that lack indentations, whereas to the right are leaves with  
339 increasingly complex indentations, but the size of each leaf in each highlighted  
340 group varies considerably. In the language of descriptive botany, the MDS axes  
341 highlight types of leaf dissection, with axis one representing a gradient from no  
342 dissection (low axis one scores) to many relatively deep indentations (high axis  
343 one score) (Fig. 6d), and axis two representing a gradient from few relatively  
344 deep indentations (low axis two scores) to many relatively shallow indentations  
345 (high axis two scores) (Fig. 6c). This morphological feature may only be recorded  
346 in the higher orders of variation in our geometric approach (fourth and fifth  
347 principal components for our modern *Ginkgo* leaves, see Fig. 2e,f). The two  
348 approaches we have described are therefore complementary, identifying similar  
349 primary patterns of variation, but also revealing some different aspects of  
350 morphological variation.

351         From the perspective of PH applied to the problem of quantifying leaf  
352 shape, previous approaches have been based on measurements of the Euler  
353 characteristic curve (Li *et al.*, 2018a,b). Our approach is different in that we have  
354 constructed a persistence barcode from a count of connected components  
355 formed by points on a contour at incremental distances from the base of a leaf  
356 blade (Fig. 4), and this demonstrates an alternative means by which PH can  
357 quantify leaf shape. Oftentimes, a challenge in the use of PH is the interpretation  
358 of a persistence barcode (e.g. Otter *et al.*, 2017), but for the barcodes we have  
359 generated here, the length of the longest bar represents the largest distance to  $P$   
360 (Fig. 4) and is therefore a quantifier of leaf size, while the next longest bar relates  
361 to the depth of the furrow in a *Ginkgo* leaf that displays this trait, and other  
362 smaller bars relate to the depth of smaller indentations in the leaf margin. The

363 statistical interpretation of persistence barcodes is also challenging, and as noted  
364 by Otter *et al.* (2017, p. 3) for example, "the space of barcodes lacks geometric  
365 properties that would make it easy to define basic concepts such as mean,  
366 median, and so on". In contrast, the framework of our geometric approach allows  
367 for the calculation of mean shapes and the linearization of data around the mean,  
368 and this highlights the complementary nature of the two approaches to leaf  
369 shape we have described in this paper.

370

### 371 ***Looking Ahead: Image Segmentation, Fossils and Future Applications***

372 Image segmentation—the partitioning of a digital image into multiple  
373 segments—is a key step in any study involving the computational analysis of  
374 digital imagery. In this study, the goal of image segmentation was to represent  
375 each leaf by its outline. For our sample of modern *Ginkgo* leaves we were able to  
376 achieve segmentation computationally because the leaves themselves were  
377 whole, free from damage such as indentations in the leaf margin, and the images  
378 were free from major defects such as blurring. However, for the fossil *Ginkgo*  
379 leaves we have analysed, segmentation involved tracing the outline of each fossil  
380 leaf by hand rather than delineating the leaf margin computationally. Such  
381 manual tracing has been used in the segmentation and analysis of images of leaf  
382 venation networks (Blonder *et al.*, 2019, 2020), and in the context of fossil  
383 leaves, this hand-tracing approach allows the analyst to manually join small  
384 areas of the leaf margin that have been fragmented by the fossilization process  
385 or damaged during the extraction or storage of the specimen.

386 In some cases of damage to a specimen, the original undamaged margin of  
387 a leaf was extremely faint, sometimes only visible using a microscope, whereas in  
388 others the leaf margin was interrupted by a scratch or hidden by a small piece of  
389 sediment (see the Supplementary Information). In situations such as these,  
390 knowledge of the processes leading to the formation and preservation of fossil  
391 leaves was used to calibrate a restoration of the fossil outline to what was judged  
392 to be its original state. This process introduces a source of potential error that is  
393 not quantified, and future work could explore how to automate elements of this  
394 image segmentation step, perhaps using a library of fossil leaf outlines produced  
395 by manual tracing to train a classifier, or perhaps repairing defects in the leaf

396 margin computationally using techniques from inpainting (see Bertalmio *et al.*,  
397 2000). The latter could be particularly valuable in studies of leaves where  
398 damage by insects is high such as in lowland moist tropical rainforests.

399 The inclusion of fossil leaves in this exploratory analysis (Fig. 6) indicates  
400 that both the PH framework and geometric methods based on elastic curves have  
401 potential application to evolutionary and palaeoecological problems that require  
402 data on leaf shape in the geological past (e.g. Johnson, 1992; Leaf Architecture  
403 Working Group, 1999; Royer *et al.*, 2008, 2009; Bacon *et al.*, 2013). Shape data  
404 derived from these approaches could also be used as classifiers in machine  
405 learning work to automate the classification of leaves in studies of modern and  
406 ancient plant diversity (cf. Wilf *et al.*, 2016), and could help quantify the nature  
407 and rate of leaf shape change during development. The methods we have  
408 described could also be used to quantify other planar shapes produced by plants  
409 such as the sepals, petals, and tepals of flowers, which may enhance studies of  
410 the relationship between morphology and pollination biology (cf. Mander *et al.*,  
411 2020)

412

### 413 **Acknowledgements**

414 We are grateful to Peta Hayes for assistance with locating, accessing, and  
415 photographing fossil *Ginkgo* leaves in the collections of the Natural History  
416 Museum, London. WM acknowledges NSF grant DMS-1722995, MB was partially  
417 supported by NSF grant DMS-1953244.

418

### 419 **References**

- 420 **Bacon KL, Belcher CM, Haworth M, McElwain JC. 2013.** Increased  
421 Atmospheric SO<sub>2</sub> Detected from Changes in Leaf Physiognomy across the  
422 Triassic–Jurassic Boundary Interval of East Greenland. *PloS ONE* **8**: e60614.
- 423 **Barthelemy D, Caraglio Y. 2007.** Plant Architecture: A Dynamic, Multilevel and  
424 Comprehensive Approach to Plant Form, Structure and Ontogeny. *Annals of*  
425 *Botany* **99**: 375–407.
- 426 **Bauer M, Bruveris M, Harms P, Møller-Andersen J. 2017.** A numerical  
427 framework for Sobolev metrics on the space of curves. *SIAM Journal on*  
428 *Imaging Sciences* **10**: 47-73.

- 429 **Bauer M, Bruveris M, Charon , Møller-Andersen J. 2019.** A relaxed approach  
430 for curve matching with elastic metrics. *ESAIM: Control, Optimisation and*  
431 *Calculus of Variations* **25**: 72.
- 432 **Bertalmio M, Sapiro G, Caselles V, Ballester C. 2000.** Image inpainting.  
433 *SIGGRAPH '00: Proceedings of the 27th Annual Conference on Computer*  
434 *Graphics and Interactive Techniques* 417–424.
- 435 **Blonder B, Both S, Jodra M, Majalop N, Burslem DFRP, Teh YA, Malhi Y.**  
436 **2019.** Leaf venation networks of Bornean trees: images and hand-traced  
437 segmentations. *Ecology* **100**: e02844.
- 438 **Blonder B, Both S, Jodra M, Xu H, Fricker M, Matos IS, Majalop N, Burslem**  
439 **DFRP, Teh YA, Malhi Y. 2020.** Linking functional traits to multiscale  
440 statistics of leaf venation networks. *New Phytologist* Early View.
- 441 **Bucksch A, Atta-Boateng A, Azihou AF, Battogtokh D, Baumgartner A,**  
442 **Binder BM, Braybrook SA, Chang C, Coneva V et al. 2017.** Morphological  
443 Plant Modeling: Unleashing Geometric and Topological Potential within the  
444 Plant Sciences. *Frontiers in Plant Science* **8**: 900.
- 445 **Chitwood DH, Klein LL, O’Hanlon R, Chacko S, Greg M, Kitchen C, Miller AJ,**  
446 **Londo JP. 2016.** Latent developmental and evolutionary shapes embedded  
447 within the grapevine leaf. *New Phytologist* **210**: 343–355.
- 448 **Johnson KR. 1992.** Leaf-fossil evidence for extensive floral extinction at the  
449 Cretaceous-Tertiary boundary, North Dakota, USA. *Cretaceous Research* **13**:  
450 91–117.
- 451 **Klassen E, Srivastava A, Mio M, Joshi SH. 2004.** Analysis of planar shapes using  
452 geodesic paths on shape spaces. *IEEE transactions on pattern analysis and*  
453 *machine intelligence* **26**: 372-383.
- 454 **Leaf Architecture Working Group. 1999.** Manual of Leaf Architecture -  
455 morphological description and categorization of dicotyledonous and net-  
456 veined monocotyledonous angiosperms. 65p.
- 457 **Leigh A, Zwieniecki MA, Rockwell FE, Boyce CK, Nicotra AB, Holbrook NM.**  
458 **2011.** Structural and physiological correlates of heterophylly in *Ginkgo*  
459 *biloba* L. *New Phytologist* **189**: 459–470.
- 460 **Leigh EG. Jr. 1999.** *Tropical Forest Ecology*. Oxford University Press, New York.

- 461 **Li M, Duncan K, Topp CN, Chitwood DH. 2017.** Persistent homology and the  
462 branching topologies of plants. *American Journal of Botany* **104**: 349–353.
- 463 **Li M, Frank MH, Coneva V, Mio W, Chitwood DH, Topp CN. 2018a.** The  
464 persistent homology mathematical framework provides enhanced  
465 genotype-to-phenotype associations for plant morphology. *Plant Physiology*  
466 **177**: 1382–1395.
- 467 **Li M, An H, Angelovici R, Bagaza C, Batushansky A, Clark L, Coneva V,**  
468 **Donoghue M, Edwards E et al. 2018b.** Topological data analysis as a  
469 morphometric method: using persistent homology to demarcate a leaf  
470 morphospace. *Frontiers in Plant Science* **9**: 553.
- 471 **Mander L, Parins-Fukuchi C, Dick CW, Punyasena SW, Jaramillo C. 2020.**  
472 Phylogenetic and ecological correlates of pollen morphological diversity in  
473 a Neotropical rainforest. *Biotropica* Early View.
- 474 **Nicotra AB, Leigh A, Boyce CK, Jones CS, Niklas KJ, Royer DL, Tsukaya H.**  
475 **2011.** The evolution and functional significance of leaf shape in the angiosperms.  
476 *Functional Plant Biology* **38**: 535–552.
- 477 **Otter N, Porter MA, Tillmann U, Grindrod P, Harington HA. 2017.** A roadmap  
478 for the computation of persistent homology. *EPJ Data Science* **6**: 17.
- 479 **Royer DL, Wilf P, Janesko DA, Kowalski EA, Dilcher DL. 2005.** Correlations of  
480 climate and plant ecology to leaf size and shape: Potential proxies for the  
481 fossil record. *American Journal of Botany* **92**: 1141–1152.
- 482 **Royer D, McElwain J, Adams J. 2008.** Sensitivity of leaf size and shape to  
483 climate within *Acer rubrum* and *Quercus kelloggii*. *New Phytologist* **179**:  
484 808–817.
- 485 **Royer DL, Meyerson LA, Robertson KM, Adams JM. 2009.** Phenotypic  
486 plasticity of leaf shape along a temperature gradient in *Acer rubrum*. *PloS*  
487 *ONE* **4**: e7653.
- 488 **Webster M, Sheets HD. 2010.** A practical introduction to landmark-based  
489 morphometrics. *Paleontological Society Special Papers* **16**: 163–188.
- 490 **Weight C, Parnham D, Waites R. 2008.** LeafAnalyser: a computational method  
491 for rapid and large-scale analyses of leaf shape variation. *Plant Journal* **53**:  
492 578–586.

493 **Wilf P, Zhang S, Chikkerur S, Little SA, Wing SL, Serre T. 2016.** Computer  
494 vision cracks the leaf code. *Proceeding of the national Academy of Sciences,*  
495 *USA* **113**: 3305–3310.

496

#### 497 **Supplementary Information**

498 A dataset of modern and fossil *Ginkgo* leaf images.

499

#### 500 **Fig. and Table captions**

501 **Fig. 1.** Collection of all 468 *Ginkgo biloba* leaves in our dataset represented by  
502 their boundary curves (black lines) with the Karcher mean leaf shape  
503 superimposed (red line).

504

505 **Fig. 2.** Geodesic PCA plots of *Ginkgo* leaves represented in the tangent space of  
506 the mean. Variance explained by each principal component (a), first principle  
507 component (b), second principle component (c), third principle component (d),  
508 fourth principle component (e), fifth principle component (f).

509

510 **Fig. 3.** PCA ordination scatterplot (PC1 on horizontal axis, PC2 on vertical axis)  
511 showing the morphological variation among 468 modern *Ginkgo* leaves that is  
512 revealed by our geometric approach to leaf shape.

513

514 **Fig. 4.** Schematic example showing the construction of a persistence barcode  
515 that describes the shape of a *Ginkgo* leaf. Four distances from the point  $P$  where  
516 the leaf blade meets the petiole are shown:  $r = 8.6, 7.0, 5.4, 3.8$  (a). At the  
517 distance  $r = 8.6$ , there are four connected components outside the dashed line  
518 (a). At the distance  $r = 7.0$ , there are three connected components, at  $r = 5.4$  there  
519 are two (the two lobes of the typical *Ginkgo* leaf), while at  $r = 3.8$  there is one  
520 uninterrupted segment of the leaf blade contour outside the dashed line (a). To  
521 construct a barcode that represents a leaf, we do not count the number of  
522 connected components at widely spaced intervals as shown in (a). Instead, we  
523 perform a count for each  $r > 0$ , and record the number of connected components  
524 as  $r$  is gradually lowered in a barcode (b).

525



526 **Fig. 5.** PCA ordination scatterplot (PC1 on horizontal axis, PC2 on vertical axis)  
527 showing the morphological variation among 468 modern *Ginkgo* leaves that is  
528 revealed by our topological (PH) approach to leaf shape. Nine leaves from the  
529 PC1 pathway (red) and nine leaves from the PC2 pathway (blue) are shown to  
530 highlight modes of morphological variation (all leaves displayed at the same  
531 scale).

532

533 **Fig. 6.** Collection of 24 fossil *Ginkgo* leaves, each represented by their boundary  
534 curves (a). PCA ordination scatterplot (PC1 on horizontal axis, PC2 on vertical  
535 axis) showing morphological variation of modern *Ginkgo* leaves (black  
536 datapoints) together with fossil *Ginkgo* leaves (red datapoints) based on our  
537 geometric approach, the PCs together explain 64% of the variation (b). MDS  
538 ordination showing morphological variation of modern *Ginkgo* leaves together  
539 with fossil *Ginkgo* leaves based on our topological approach, with a vertical  
540 transect of enlarged leaves highlighted in blue (c) and a vertical transect of  
541 enlarged leaves highlighted in blue (d). Modern leaves displayed with black  
542 datapoints and fossil leaves displayed with red datapoints (b–d).

543

544

545

546

547

548

549

550

551

552

553

554

555

556

557

558 **Table 1.** Fossil *Ginkgo* leaves housed in the collections of the Natural History  
 559 Museum, London, and The Open University that we have investigated in this  
 560 paper.  
 561

| Specimen Name             | Accession Number                   | Age              | Country       | Location        | Specimen Number (This Study) |
|---------------------------|------------------------------------|------------------|---------------|-----------------|------------------------------|
| <i>Ginkgo cranei</i>      | NHM: V.68763                       | Paleocene        | United States | North Dakota    | fossil_1                     |
| <i>Ginkgo cranei</i>      | NHM: V.68764                       | Paleocene        | United States | North Dakota    | fossil_2                     |
| <i>Ginkgo gardneri</i>    | NHM: V.14834                       | Eocene           | Scotland      | Isle of Mull    | fossil_3                     |
| <i>Ginkgo gardneri</i>    | NHM: V.14838                       | Paleocene/Eocene | Scotland      | Isle of Mull    | fossil_4                     |
| <i>Ginkgo gardneri</i>    | NHM: V.18436                       | Eocene           | Scotland      | Isle of Mull    | fossil_5                     |
| <i>Ginkgo gardneri</i>    | NHM: V.24999                       | Eocene           | Scotland      | Isle of Mull    | fossil_6                     |
| <i>Ginkgo sp.</i>         | NHM: V.2477                        | Eocene           | Scotland      | Isle of Mull    | fossil_7                     |
| <i>Ginkgo digitata</i>    | NHM: V.24587                       | Cretaceous       | Australia     | Queensland      | fossil_8                     |
| <i>Ginkgo digitata</i>    | NHM: V.39211                       | Jurassic         | England       | Yorkshire       | fossil_9                     |
| <i>Ginkgo digitata</i>    | NHM: V.13503                       | Jurassic         | England       | Yorkshire       | fossil_10                    |
| <i>Ginkgo digitata</i>    | NHM: V.10316                       | Jurassic         | England       | Yorkshire       | fossil_11                    |
| <i>Ginkgo huttonii</i>    | NHM: V.60195                       | Jurassic         | England       | Yorkshire       | fossil_12                    |
| <i>Ginkgo huttonii</i>    | NHM: V.3580                        | Jurassic         | England       | Yorkshire       | fossil_13                    |
| <i>Ginkgo huttonii</i>    | NHM: V.40511                       | Jurassic         | England       | Yorkshire       | fossil_14                    |
| <i>Ginkgo huttonii</i>    | NHM: V.39210                       | Jurassic         | England       | Yorkshire       | fossil_15                    |
| <i>Ginkgo huttonii</i>    | NHM: V.978                         | Jurassic         | England       | Yorkshire       | fossil_16                    |
| <i>Ginkgo huttonii</i>    | NHM: V.979                         | Jurassic         | England       | Yorkshire       | fossil_17                    |
| <i>Ginkgo longifolius</i> | NHM: V.39209                       | Jurassic         | England       | Yorkshire       | fossil_18                    |
| <i>Ginkgo siberica</i>    | NHM: V.58618                       | Jurassic         | England       | Yorkshire       | fossil_19                    |
| <i>Ginkgo digitata</i>    | NHM: V.3423                        | Jurassic         | England       | Gloucestershire | fossil_20                    |
| <i>Ginkgo digitata</i>    | NHM: V.3429                        | Jurassic         | England       | Gloucestershire | fossil_21                    |
| <i>Ginkgo siberica</i>    | NHM: V.19238                       | Jurassic         | Russia        | Irkutsk         | fossil_22                    |
| <i>Ginkgo huttonii</i>    | Open University geology collection | Jurassic         | England       | Yorkshire       | fossil_23                    |
| <i>Ginkgo huttonii</i>    | Open University geology collection | Jurassic         | England       | Yorkshire       | fossil_24                    |

562

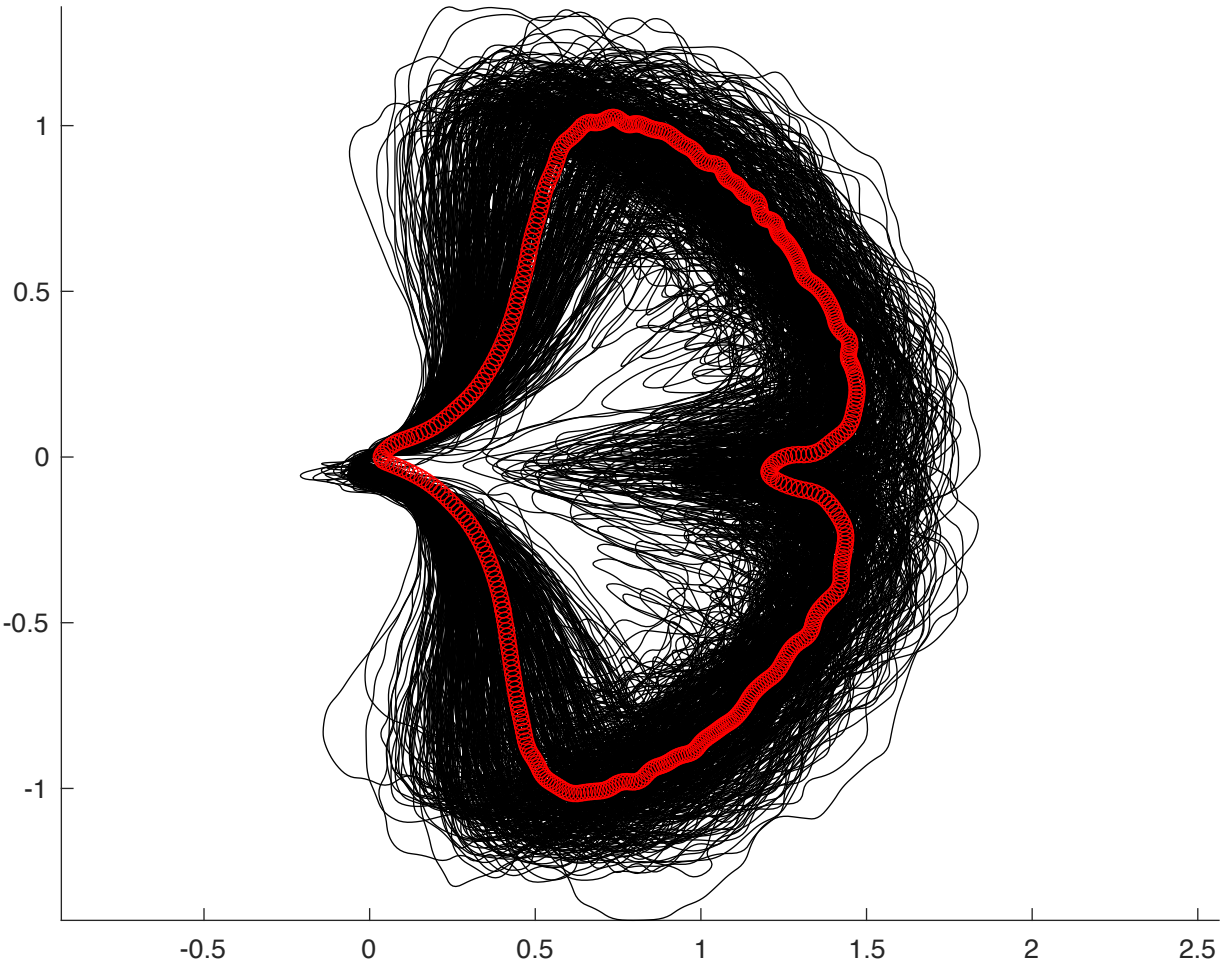

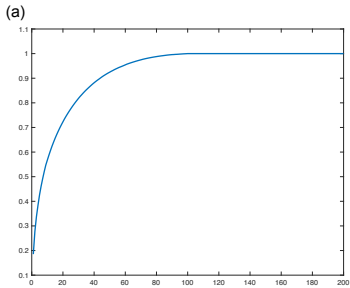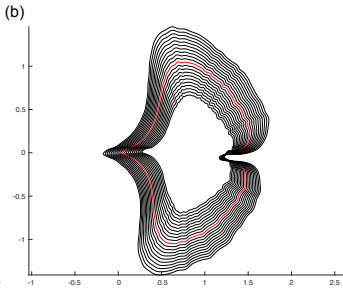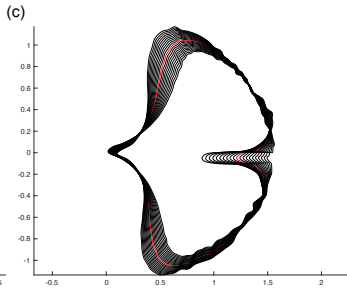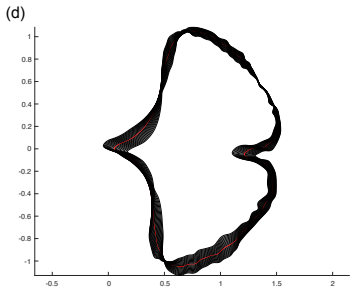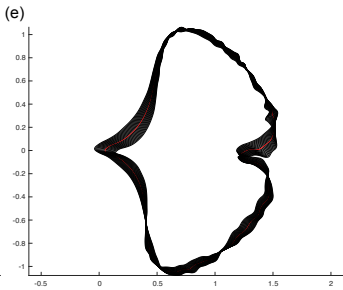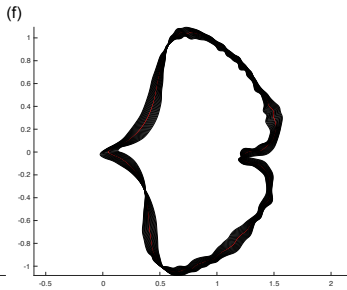

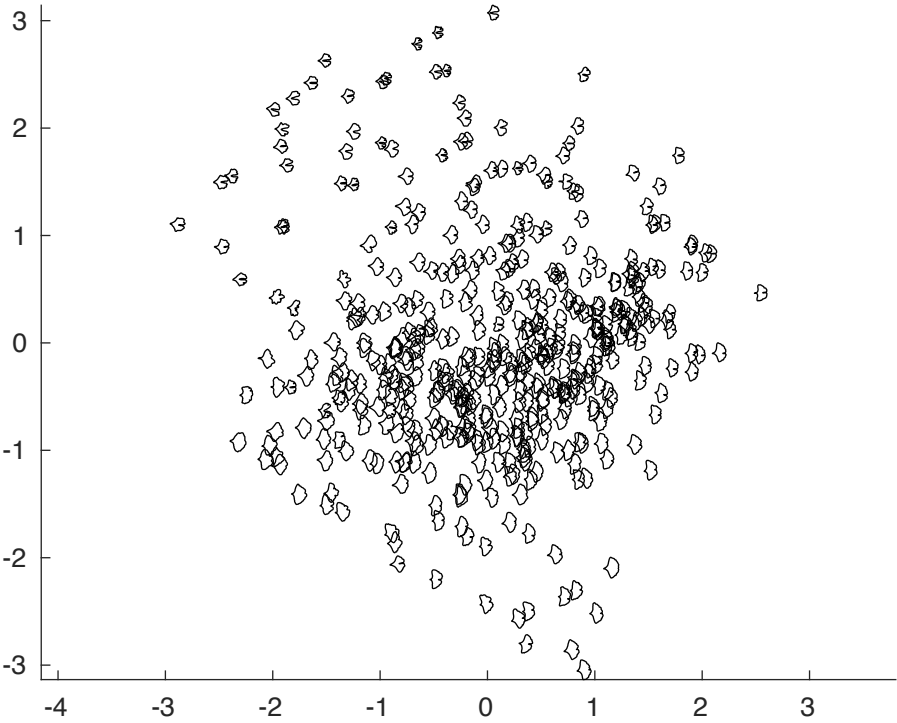

(a)

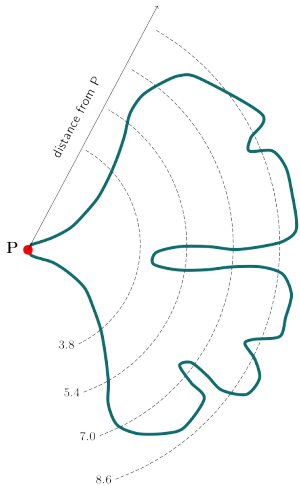

(b)

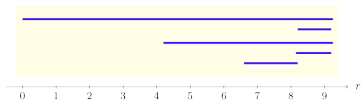

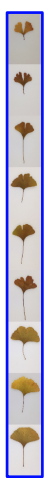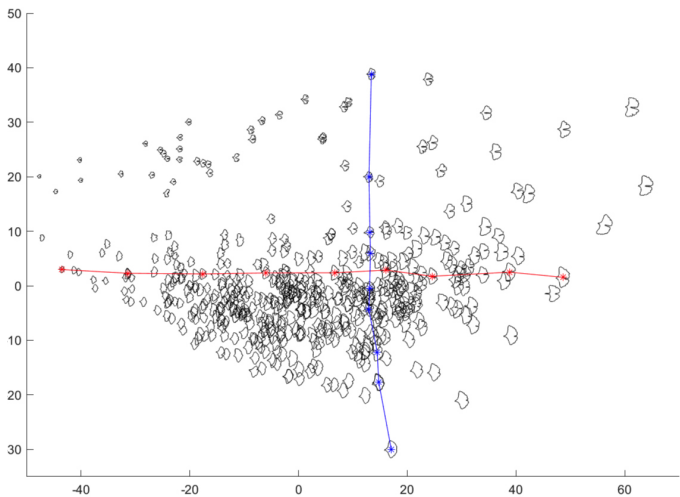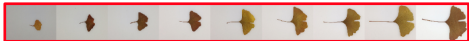

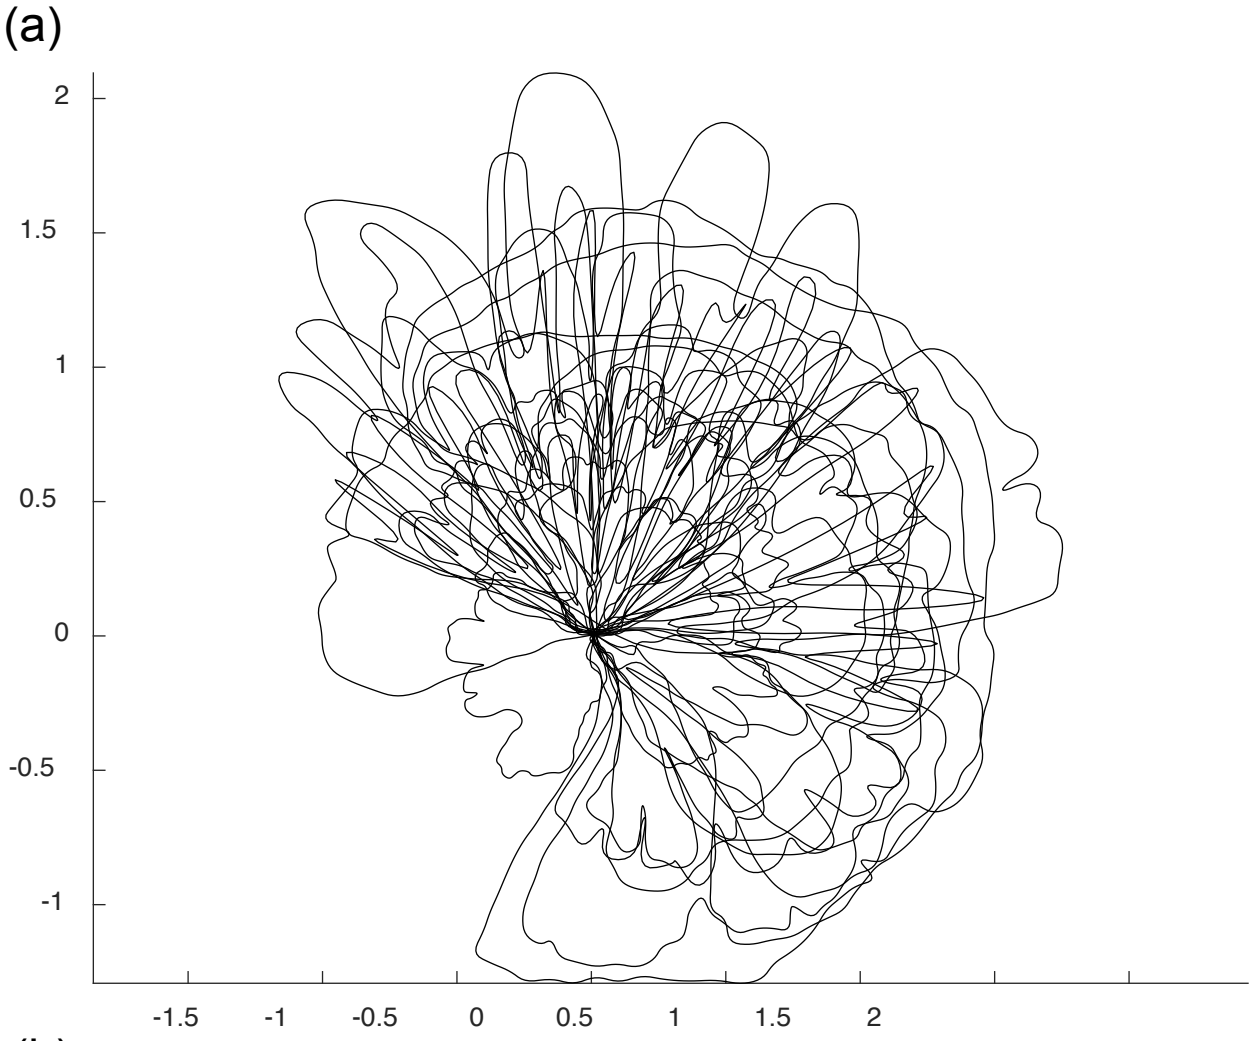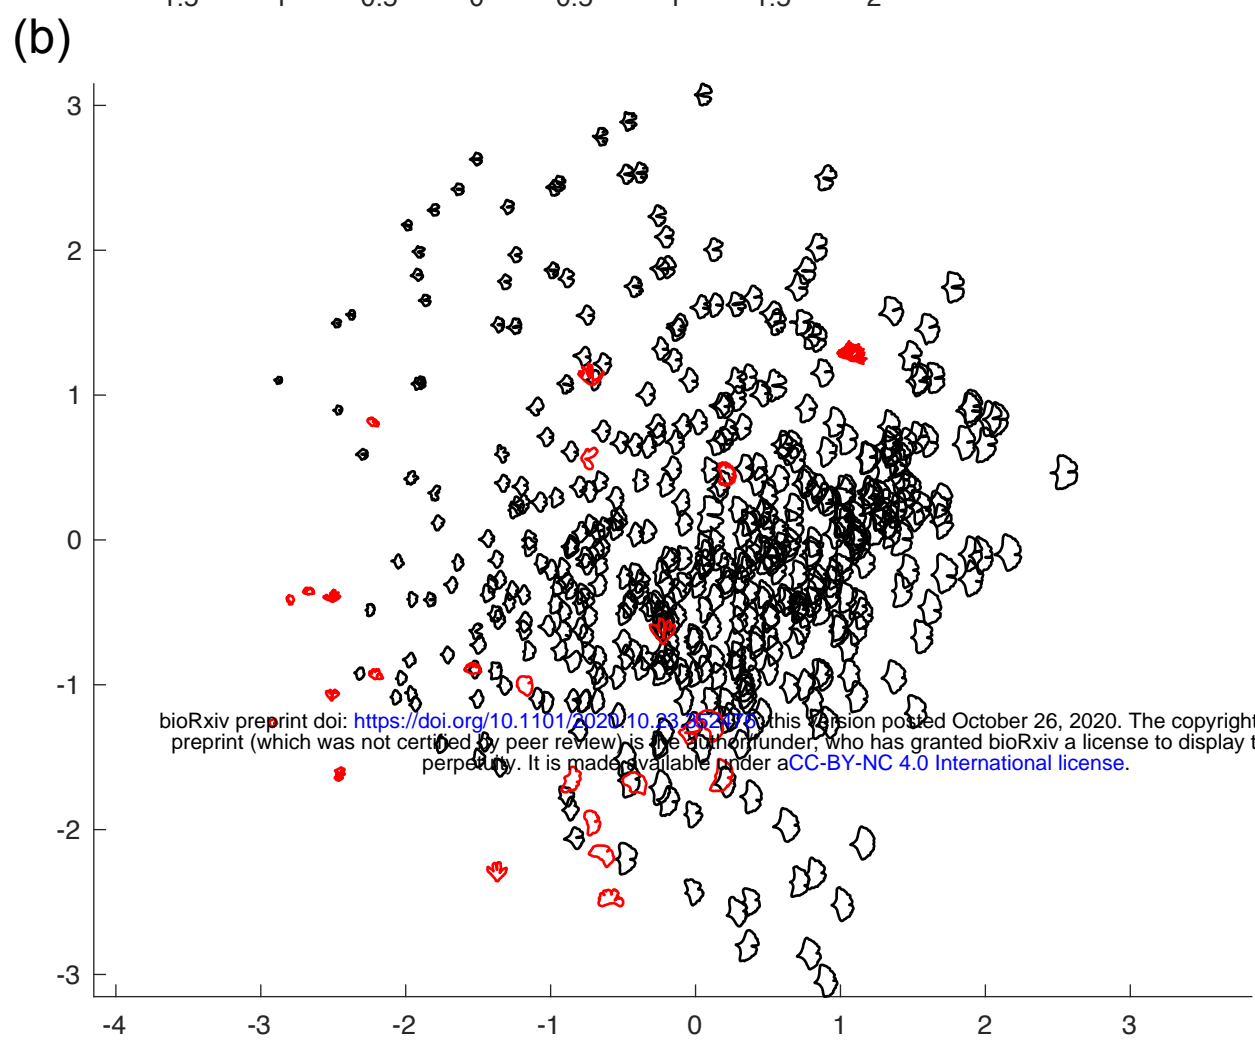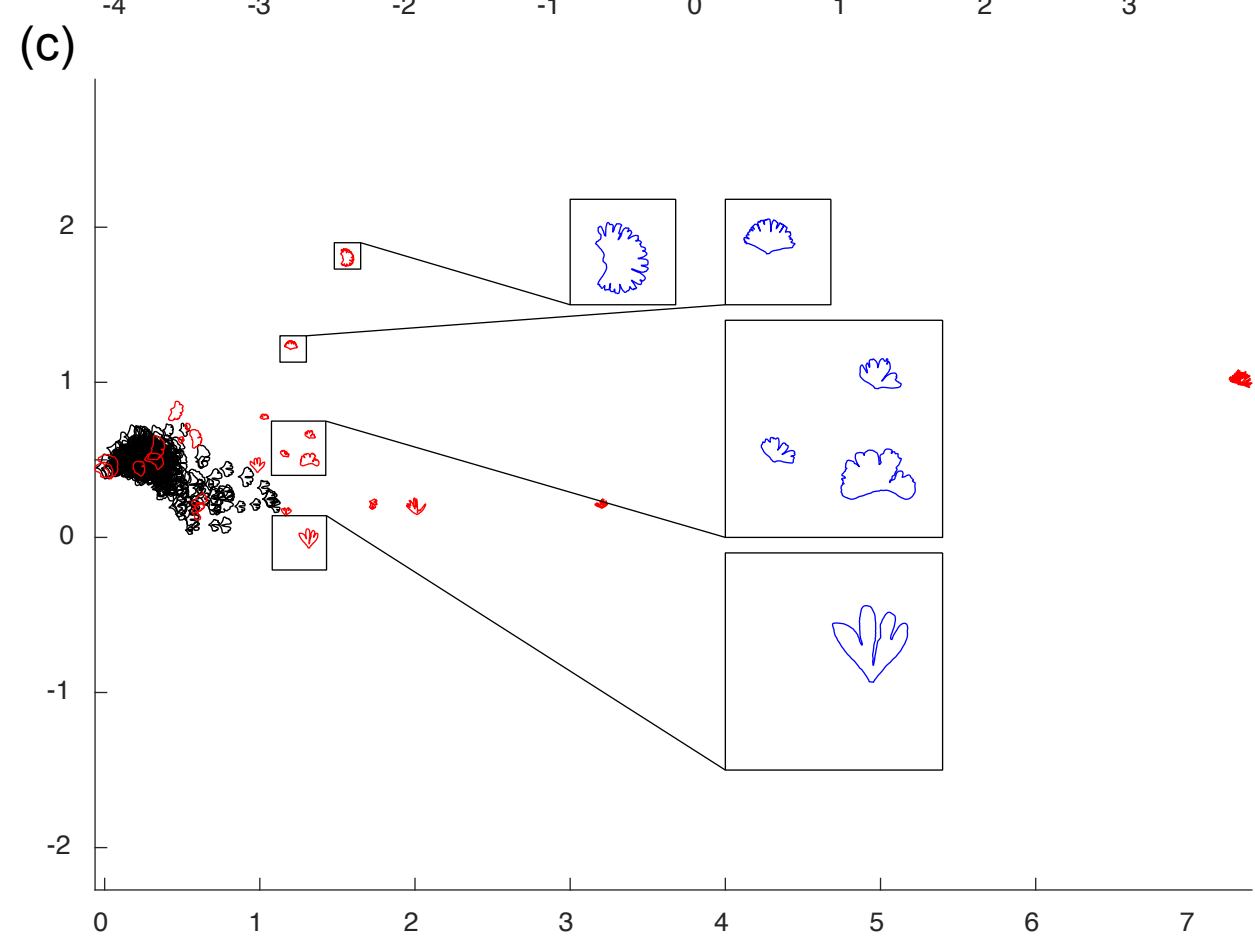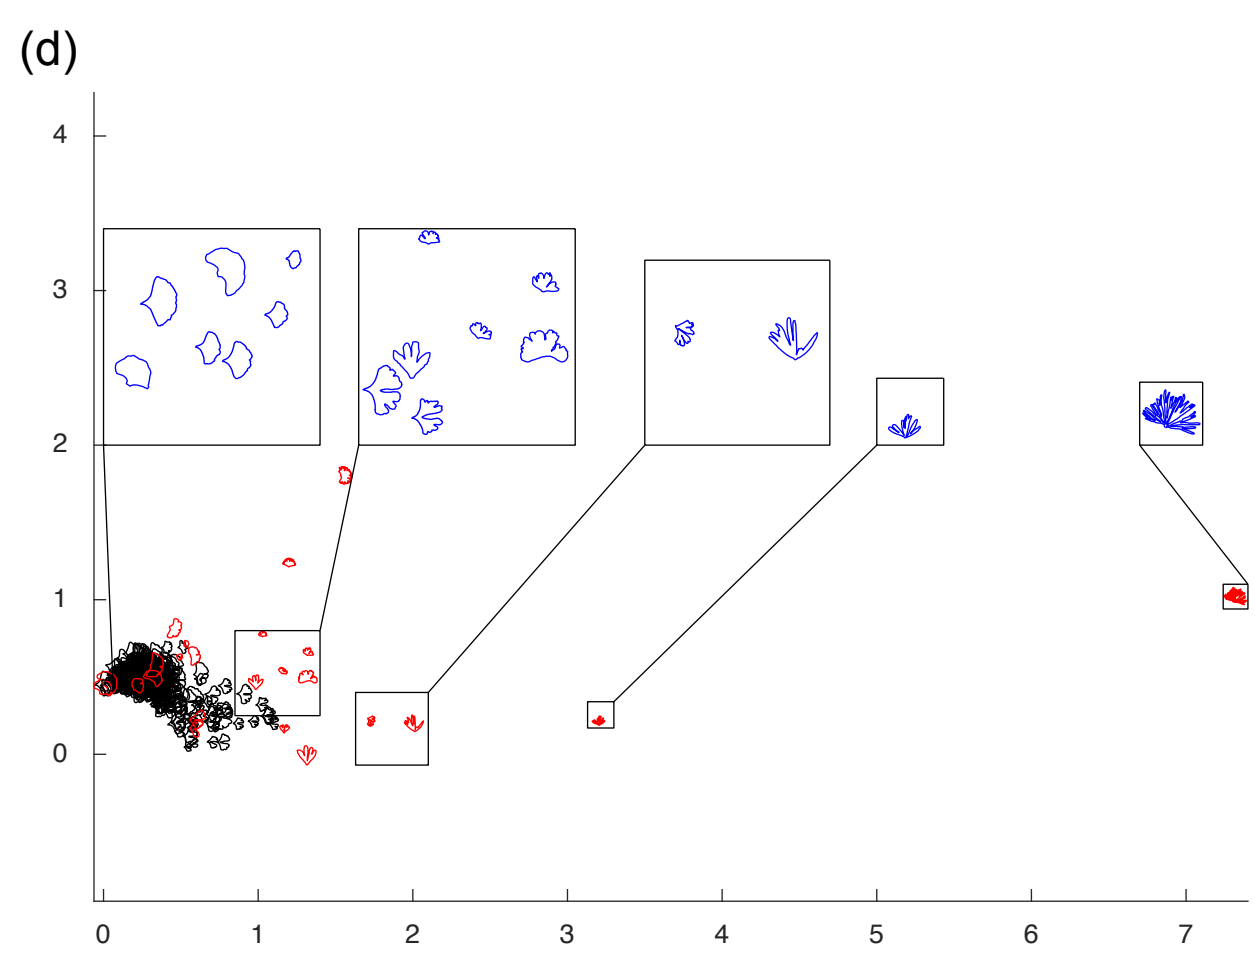

Source: https://www.biorxiv.org/content/10.1101/2020.10.23.352476v2.full.pdf
